# Supplementary material for: Estimation of the Optimal Statistical Quality Control Sampling Time Intervals Using a Residual Risk Measure
Source: PLoS One. 2009 Jun 9;4(6):e5770. doi: 10.1371/journal.pone.0005770 (PMC2689359; doi:10.1371/journal.pone.0005770)
Supplement: Appendix S1 — (0.18 MB DOC) [file pone.0005770.s001.doc]

## Notation

### Notation of the states of the system

*R*: The reliability state.

*M*: The maintenance state.

*F*: The failure state.

*Fj*: The failure state because of the *j*th failure mode.

(*A* | B): The state *A* given the state *B*.

(*A* |¬*B*): The state *A* given the negation of the state *B*.

(*A, B*): The combined states *A* and *B.*

(*A, B |C)*: The combined states *A* and *B,* given the state *C.*

### Notation of the probability functions

P*i*(*S*) The probability of the transition to the state *S* during the *i*th sampling time interval.

Pc*i*(*S*): The conditional probability of the transition to the state *S* during the *i*th sampling time interval, given that the system was not in that state before *ti-*1.

Ps*i*(*S*): The probability of the state *S* at the end of the *i*th sampling time interval

Prej*c*(*S*): The probability of rejection because of the state *S*, assuming one control per level and *c* levels of controls.

### Notation of the probability density functions

g0: The probability density function of the measurement error of the reliability state.

g*j*: The probability density function of the measurement error because of the *j*th failure mode.

g*h,j*: The probability density function of the measurement error because of the *h*th and *j*th failure modes.

: The probability density function of the measurement error at the *c*th level of controls because *o*f the *h*th and *j*th failure modes.

: A component density function of the mixture probability density function of the measurement error because of the *j*th failure mode.

u0: A uniform probability density function with an arbitrary large interval [-ω,ω].

f*j*: The failure time probability density function of the *j*th failure mode.

f*h,j*: The unconditional failure time probability density function of the combined *j*th and *h*th failure modes.

f*h,j|j*: The conditional failure time probability density function of the combined *h*th and *j*th failure modes, given the *j*th failure mode.

### Notation of other functions

MTF(*Fj*): The mean time to failure because of the *j*th failure mode

HR(*Fj*): The hazard rate of the *j*th failure mode

MTCF: The mean time to critical failure of the analytical system.

Co*h,j*(f*h*(*t*), f*j*(*t*)): A bivariate dependence function of the failure time probability density functions of the *h*th and *j*th failure modes.

MT*i*(*S*): The expected time from the transition of a system to the state *S*, assuming that the transition happens during the *i*th sampling time interval.

ce(*x*): The critical error of the measurement error *x*.

Lr*i,d*(*S*): The risk function of the *S* state based on the normalized sum of the *d*th upper and lower partial moments of the measurement error with reference to *mte* and–*mte* respectively, for the *i*th sampling time interval.

Lr*i,d,c*(*S*): The residual risk function of the *S* state based on the normalized sum of the *d*th upper and lower partial moments of the measurement error with reference to *mte* and–*mte* respectively, for the *i*th sampling time interval, assuming one control per level and *c* levels of controls.

C*i,c*(*S*): The cost function of the *S* state, at the end of the *i*th sampling time interval, assumingone control per level and *c* levels of controls.

### Notation of the vectors and matrices

**s***n*: The state vector of a system with *n* failure modes.

**p***i,c***(s***n***)**: The state probability vector of a system with *n* failure modes, at the end of the *i*th sampling time interval, assuming one control per level and *c* levels of controls.

**pc*i,c*(*s****n*|¬*M***)**:The conditional state probability vector of a system with *n* failure states, at the end of the *i*th sampling time interval, given that the system has not been in the maintenance state, assuming one control per level and *c* levels of controls.

**T***n*: The state transition matrix of a system with *n* failure modes.

**R***n ,i*: The state transition probability matrix of a system with *n* failure modes at the *i*th sampling time interval.

**M***n,i*:The matrix of the normalized expected times from the state transitions of a system with *n* failure modes at the *i*th sampling time interval.

**Q***n,i,c*: The transition probability matrix because of the application of the QC procedure of a system with *n* failure modes at the end of the *i*th sampling time interval, assuming one control per level and *c* levels of controls.

**r***c,d***(s***n***)**: The risk vector of a system with *n* failure modes, assuming one control per level and *c* levels of controls. The risk functions are based on the normalized sum of the *d*th upper and lower partial moments of the measurement error with reference to *mte* and–*mte* respectively.

**ct***i,c***(s***n***)**: The quality related cost vector of a system with *n* failure states, assuming one control per level and *c* levels of controls.

### Notation of the measures

Mce*d*(*S*): A critical error measure of a state *S* based on the *d*th upper and lower partial moments of the measurement error with reference to *mte* and–*mte* respectively.

NMce*d*(*S*): A critical error measure of a state *S* based on the normalized sum of the *d*th upper and lower partial moments of the measurement error with reference to *mte* and–*mte* respectively .

RLr*d*(*S*): A risk rate measure of a state *S* based on the normalized sum of the *d*th upper and lower partial moments of the measurement error with reference to *mte* and–*mte* respectively .

RLrr*c*,*d*(*S*): A residual risk rate measure of a state *S* based on the normalized sum of the *d*th upper and lower partial moments of the measurement error with reference to *mte* and–*mte* respectively , assuming one control per level and *c* levels of controls.

*rn,i,c,d*: A risk measure of an analytical system with *n* failure modes during the *i*th sampling time interval, based on the normalized sum of the *d*th upper and lower partial moments of the measurement error with reference to *mte* and–*mte* respectively, assuming one control per level and c levels of controls.

*rrn,i,c,d*: A residual risk measure of an analytical system with *n* failure modes after the *i*th sampling time interval, based on the normalized sum of the *d*th upper and lower partial moments of the measurement error with reference to *mte* and–*mte* respectively, assuming one control per level and c levels of controls.

A QC related cost measure of an analytical system with *n* failure modes at the *i*th sampling time interval, assuming one control per level and c levels of controls.

### Notation of the performance measures

: The mean total time of application of the algorithm until the system enters the maintenance state, of a series of up to *k* sampling time intervals, assuming *n* critical-failure modes, initial time *t*0 and initial state probability vector **p**0**(s***n***).**

**:** The mean number of sampling time intervals until the system enters the maintenance state, of a series of up to *k* sampling time intervals, assuming *n* critical-failure modes, initial time *t*0 and initial state probability vector **p**0**(s***n***).**

**:** The mean sampling time interval length, until the system enters the maintenance state, of a series of up to *k* sampling time intervals, assuming *n* critical-failure modes, initial time *t*0 and initial state probability vector **p**0**(s***n***).**

: The mean residual risk measure per time interval, until the system enters the maintenance state, of a series of up to *k* sampling time intervals, assuming *n* critical-failure modes, one control per level and *c* levels of controls, a risk function based on the normalized sum of the *d*th upper and lower partial moments of the measurement error with reference to *mte* and–*mte* respectively, initial time *t*0 and initial state probability vector **p**0**(s***n***).**

: The mean expected QC related cost per time unit measure, until the system enters the maintenance state, of a series of up to *k* sampling time intervals, assuming *n* critical-failure modes, one control per level and *c* levels of controls, initial time *t*0 and initial state probability vector **p**0**(s***n***).**

### Notation of the parameters

*ti*: The end of the *i*th sampling time interval

*l*: The decision limit of the QC rule.

*lc*: The decision limit of the QC rule applied to the *c*th level of controls.

*mte*: The medically acceptable measurement error

*μ*0: The mean of the measurement error during the reliability state.

*σ*0: The standard deviation of the measurement error during the reliability state.

*μj*: The mean of the measurement error because of the *j*th failure mode.

*σj*: The standard deviation of the measurement error because of the *j*th failure mode.

*μj,h*: The mean of the measurement error of the *h*th level of controls because of the *j*th failure mode, assuming a multivariate distribution of the measurement error.

*σj,h*: The standard deviation of the measurement error of the *h*th level of controls because of the *j*th failure mode, assuming a multivariate distribution of the measurement error.

: The mean of the component probability density function of the mixture probability density function of the measurement error because of the *j*th failure mode.

: The standard deviation of a component probability density function of the mixture probability density function the measurement error because of the *j*th failure mode

*wj*: The probability of the component probability density function of the mixture probability density function of the measurement error because of the *j*th failure mode.

*ρj,h,k*: The correlation coefficient of the measurement error of the *j*th failure mode between the *h*th and *k*th levels of controls, assuming a multivariate distribution of the measurement error.

*ρj*: The correlation coefficient of the measurement error of the *j*th failure mode between the twolevels of controls, assuming a bivariate distribution of the measurement error.

*αj*: A shape parameter of the general distribution of the *j*th failure mode.

*βj*: A shape parameter of the general distribution of the *j*th failure mode.

*γj* : A parameter of the general distribution of the *j*th failure mode.

*θj* : A scale parameter of the general distribution of the *j*th failure mode.

*λj*: A scale parameter of the general distribution of the *j*th failure mode.

*τi*: A time subinterval of the *i*th sampling time interval.

*q*: The cost of each control

*m*: The maintenance state related cost

### Notation of operators

: The dot product

: The Hadamard product

T: The transpose operator.

## Partial moments

The *d*th moment of a probability density function g(*x*) of a real variable *x* about a value *c* is defined as:

The *d*th lower and upper partial moments of the same function g(*x*) with reference to *c* are defined as:

For *d* ≥ 0 and *c>0* the normalized sum of the *d*th upper and the absolute value of the *d*th lower partial moments of the measurement error probability density function g(*x*) with reference to  *mte* and–*mte* respectively equals:

## Definition of functions assuming multivariate measurement error probability density functions

The probability density function of a bivariate normal distribution of the measurement error is:

If the measurement error of the two levels of the concentration of the measurand of the controls is uncorrelated we have:

Assuming a bivariate distribution of the measurement error and QC rules applied to one control per level at the two levels of controls, with respective decision limits *l*1 and *l*2, the probability of rejection because of the *j*th failure mode, at the *i*th sampling time interval is:

Assuming an additive measurement error model, the respective probability of rejection because of the combined *j*th and *h*th failure modes is:

The critical measurement error measures that are defined for the *i*th sampling time interval, based on the *d*th upper and the absolute value of the *d*th lower partial moments of the measurement error with reference to *mte* and–*mte* respectively are (see eq. ):

If the measurement error of the two failure modes is correlated then a quad-variate pdf can be used. If the measurement error of the two levels of the concentration of the controls is uncorrelated then we have:

where and the probability density functions of the measurement error at the 1st and 2nd level of the controls because of the the  *j*th and *h*th failure modes.

In general, the probability density function of the measurement error of the *c* correlated levels of the concentration of the measurand of the controls because of *n* critical-failure modes with correlated measurement error is *cn*-variate. The respective covariance matrix can be estimated [21-23].
